# 1 **Predicting T Cell Quality During Manufacturing Through an Artificial** 2 **Intelligence-based Integrative Multi-Omics Analytical Platform**

3 Valerie Y. Odeh-Couvertier, Nathan J. Dwarshuis, Maxwell B. Colonna, Bruce L. Levine, Arthur  
4 S. Edison, Theresa Kotancheck, Krishnendu Roy, and Wandaliz Torres-Garcia\*

## 5 6 **Acknowledgments**

7 The material is based upon work supported by the National Science Foundation under Grant No.  
8 EEC-1648035. The work and views presented are those of the authors and do not reflect the views  
9 of the National Science Foundation. The research work from N.J.D. and K.R. was also partially  
10 supported by funds from The Billie and Bernie Marcus Foundation, The Georgia Research  
11 Alliance, and the Georgia Tech Foundation through their support of the Marcus Center for  
12 Therapeutic Cell Characterization and Manufacturing (MC3M) at Georgia Tech. N.J.D. would like  
13 to thank Melissa Kemp for access to the Bioplex 200 machine and to Levi Wood/Laura Weinstock  
14 for the optimized Luminex protocol. M.B.C. would like to thank Hesam Dashti for assistance with  
15 getting additional GISSMO compound entries and simulation frequencies uploaded to enable the  
16 mixture simulation.

## 17 18 **Author information**

19 Valerie Y. Odeh-Couvertier, Nathan J. Dwarshuis, and Maxwell B. Colonna: These authors  
20 contributed equally to this work.

21 Affiliations

22 **Department of Industrial Engineering, University of Puerto Rico Mayagüez, Mayagüez, PR,**  
23 **00681, USA**

24 Valerie Y. Odeh-Couvertier & Wandaliz Torres-Garcia

25 **The Wallace H. Coulter Department of Biomedical Engineering, Georgia Institute of**  
26 **Technology, Atlanta, GA, 30318, USA**

27 Nathan J. Dwarshuis & Krishnendu Roy

28 **Departments of Genetics and Biochemistry & Molecular Biology, Complex Carbohydrate**  
29 **Research Center, University of Georgia, Athens, GA, 30602, USA**

30 Maxwell B. Colonna & Arthur S. Edison

31 **Center for Cellular Immunotherapies, Perelman School of Medicine, University of**  
32 **Pennsylvania, Philadelphia, PA, 19104, USA**

33 Bruce L. Levine

34 **Evolved Analytics LLC, Rancho Santa Fe, CA, USA**

35 Theresa Kotanchek

36

### 37 **Contributions**

38 N.J.D. designed and performed the T cell culturing experiments and measured cytokine profiles.

39 M.B.C. and A.S.E. designed and performed the NMR media analysis. V.Y.O. and W.T. executed

40 the machine learning techniques and integrated computational tools in the workflow. T.K.

41 implemented optimization and predictive analysis using DataModeler. V.Y.O., N.J.D., M.B.C.,

42 B.L.L., A.S.E., T.K., K.R., and W.T. interpreted the data and results. All authors contributed to

43 the writing, revising, and editing of the manuscript.

44

### 45 **Corresponding author**

46 Correspondence to [Wandaliz Torres-García\\*](#).

47

48 **Ethics declarations**

49 Competing Interests

50 B.L.L. declares financial interest intellectual property and patents in the field of cell and gene  
51 therapy (University of Pennsylvania Alliance with Novartis, licensing, and royalty fees). B.L.L. is  
52 a consultant for Novartis, Terumo, and Lilly Asia Ventures and he is part of the Scientific Advisory  
53 Board for Avectas, Brammer Bio/TF Viral Vector Services, Immuneel, Incysus, Ori Biotech, and  
54 Vycellix. Moreover, B.L.L. is the co-founder and equity holder Tmunity Therapeutics and all of  
55 his conflict of interest is managed in accordance with University of Pennsylvania policy and  
56 oversight. T.K. is the Chief Executive Officer of Evolved Analytics, LLC. The remaining authors  
57 declare no competing interests. K.R declares consulting, intellectual property, and patents in cell  
58 and gene therapy. K.R. is a consultant to Terumo, Merck. LEK consulting, Mubadala Ventures,  
59 Anzu Partners, Decibio, and Clearview Healthcare Partners. K.R. serves on the advisory board of  
60 the MIT-Singapore Cell therapy Partnership.

61 **Abstract**

62 Large-scale, reproducible manufacturing of therapeutic cells with consistently high quality is vital  
63 for translation to clinically effective and widely accessible cell therapies. However, the biological  
64 and logistical complexity of manufacturing a living product, including challenges associated with  
65 their inherent variability and uncertainties of process parameters, currently make it difficult to  
66 achieve predictable cell-product quality. Using a degradable microscaffold-based T cell process as  
67 an example, we developed an Artificial Intelligence (AI)-driven experimental-computational  
68 platform to identify a set of critical process parameters (CPP) and critical quality attributes (CQA)  
69 from heterogeneous, high dimensional, time-dependent multi-omics data, measurable during early  
70 stages of manufacturing and predictive of end-of-manufacturing product quality. Sequential,  
71 Design-of-Experiment (DOE)-based studies, coupled with an agnostic machine-learning  
72 framework, were used to extract feature combinations from media assessment that were highly  
73 predictive of total live CD4<sup>+</sup> and CD8<sup>+</sup> naïve and central memory (CD63L<sup>+</sup>CCR7<sup>+</sup>) T cells and  
74 their ratio in the end-product. This computational workflow could be broadly applied to any cell  
75 therapy and provide a roadmap for discovering CQAs and CPPs in cell manufacturing.

## 76 **Introduction**

77 T cell-based immunotherapies have received great interest from clinicians and industry due to their  
78 potential to treat, and often functionally cure some cancers and their potential applicability in many  
79 other diseases<sup>1,2</sup>. Since 2017, four genetically modified autologous Chimeric Antigen Receptor  
80 (CAR) T cell therapies (*Yescarta*<sup>TM</sup>, *Kymriah*<sup>TM</sup>, *Tecartus*<sup>TM</sup>, *Breyanzi*<sup>®</sup>) have received FDA  
81 approval to treat certain B-cell malignancies. Despite these successes, CAR-T cell therapies are  
82 constrained by poorly-understood manufacturing processes that are time-intensive, expensive, and  
83 difficult to scale<sup>3,4</sup> with a lack of methods and tools to predict product quality during manufacturing  
84 and identify product Critical Quality Attributes (CQAs) and the associated Critical Process  
85 Parameters (CPPs).

86 Translating laboratory-scale T cell expansion experiments into a large-scale manufacturing  
87 process is hindered by the incomplete understanding of cell properties and how they are affected  
88 by process variables, lack of detailed characterization, and high variability of materials during  
89 manufacturing<sup>5</sup>. These challenges of manufacturing a “living product” are further magnified since  
90 current chemistry, manufacturing, and control (CMC), analytics, regulations, and product-  
91 specifications are designed for conventional chemical and biopharmaceutical manufacturing  
92 systems<sup>6</sup>. This underscores the need to develop innovative tools, methods, and standards to ensure  
93 appropriate quality controls, and new strategies involving quality by design (QbD) and good  
94 manufacturing practices (GMP) for cell-based therapies<sup>7-9</sup>. The intricate manufacturing process  
95 for T cells and other cell therapies must be deeply assessed and appropriately controlled to ensure  
96 scalability, predictability, and a high-quality manufacturing process at the most reasonable cost. A  
97 key step for reaching this goal is to identify putative CQAs and CPPs early in the manufacturing  
98 process that can predict the quality of the manufactured cell-therapy product. We hypothesized

99 that rigorous characterization of process parameters along with longitudinal measurements of cell-  
100 secreted cytokine, chemokine, and metabolites from the culture media early during manufacturing  
101 will allow us to develop an AI-based mathematical-computational framework for the identification  
102 of multivariate parameters that are predictive of the end-of-manufacturing product phenotypes.

103 Characterization studies of approved autologous anti-CD19 CAR-T cell therapies have recently  
104 revealed initial sets of candidate quality attributes, i.e. percent transduction, vector copy number,  
105 and interferon- $\gamma$  production for Axicabtagene ciloleucel (Yescarta<sup>TM</sup>)<sup>10</sup> while CAR expression and  
106 release of interferon- $\gamma$  are a few of those identified for Tisagenlecleucel (Kymriah<sup>TM</sup>)<sup>11</sup>. Many of  
107 these attributes are calculated as endpoint responses and thus a deeper understanding of the cell  
108 growth process impacted by starting conditions and performance during their manufacturing is  
109 essential. Hence, CQAs that enable early monitoring through real-time process measurements such  
110 as multi-omics cell characterization can overcome current challenges in assessing product  
111 consistency. Yet, the computational complexity of dealing with the heterogeneity and multivariate  
112 nature of multi-omics measurements to characterize T cell quality, i.e., high definition phenotyping  
113 of naïve and memory subsets, remains a challenge.

114 Generally, T cells with a lower differentiation state such as naïve and stem cell or central memory  
115 cells have been shown to provide superior anti-tumor potency, presumably due to their higher  
116 potential to replicate, migrate, and engraft, leading to a long-term, durable response<sup>18-21</sup>. Likewise,  
117 CD4 T cells are similarly important to anti-tumor potency due to their cytokine release properties  
118 and ability to resist exhaustion<sup>22,23</sup>. Our group has developed a novel degradable microcavity  
119 (DMS)-based method using porous microcarriers functionalized with anti-CD3 and anti-CD28  
120 mAbs for use in T cell expansion cultures. We showed that compared to commercially available  
121 microbeads (Miltenyi), degradable microcavities (DMSs) generated a higher number of

122 migratory naïve ( $T_N$ ) and central-memory ( $T_{CM}$ ) ( $CCR7^+CD62L^+$ ) T cells and  $CD4^+$  T cells across  
123 multiple donors<sup>12</sup>. We used this manufacturing process as an exemplar to develop an experimental-  
124 computational AI-based tool to predict product quality from early process measurements. This  
125 two-phase approach consists of (1) the optimization of process parameters through experimental  
126 designs, and (2) the extraction of early predictive signatures of T cell quality by multi-omics  
127 integration using regression models. This agnostic computational approach provides a platform to  
128 discover early predictive CQAs and CPPs to ensure consistent product quality, that can be widely  
129 applicable for other cellular therapies.

130

## 131 **Results**

### 132 I. Overall multi-omics study design

133 T cells were expanded *ex vivo* for 14 days and 100  $\mu$ L of supernatant media samples were collected  
134 at days 4, 6, 8, 11, and 14 to measure cytokine profiles and perform NMR analysis. Endpoint  
135 responses on DMS-based T cell extracts were measured for different combinations of DMS  
136 parameters: IL2 concentration, DMS concentration, and functionalized antibody percent. Two  
137 experimental regions were determined using a design-of-experiments (DOE) methodology to  
138 maximize the yields of  $CD62L^+CCR7^+$  cells (i.e. naïve and central memory T cells,  $T_N+T_{CM}$ ) as a  
139 function of these process parameters. The first DOE resulted in a randomized 18-run I-optimal  
140 custom design where each DMS parameter was evaluated at three levels. To further optimize this  
141 DOE in terms of total live  $CD4^+$   $T_N+T_{CM}$  cells, a sequential adaptive design-of-experiment  
142 (ADOE) was designed with 12 additional samples (Fig.1b). All 30 runs from both experiments  
143 (DOE, ADOE) were molecularly characterized to model total live  $T_N+T_{CM}$  (a)  $CD4^+$ , (b)  $CD8^+$ ,  
144 and (c) their ratio. The extraction of early predictive CPPs and CQAs for the expansion of  $T_N+T_{CM}$

145 cells during *ex vivo* culture was performed in two phases: (1) optimization of process parameters,  
 146 and (2) integration of multi-omics for predictive modeling (Fig.1).

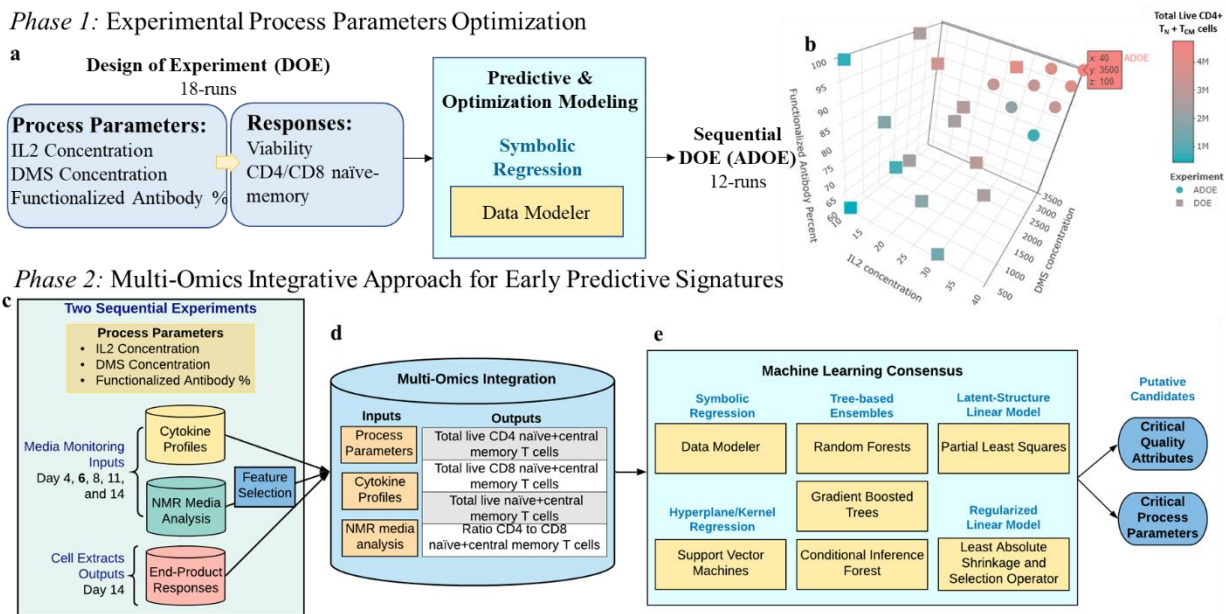

147

148 **Fig.1. Two-phase approach to extract early predictive CPPs and CQAs for CD4<sup>+</sup>/CD8<sup>+</sup>**  
 149 **T<sub>N</sub>+T<sub>CM</sub> cells.** **a** DOE modeling and optimization of process parameters. **b** Experimental region  
 150 studied and optimized for total live CD4<sup>+</sup> T<sub>N</sub>+T<sub>CM</sub> cells. **c** Overall study design (two experiments  
 151 varying process parameters while measuring multi-omics and T<sub>N</sub>+T<sub>CM</sub> responses. **e**). **d** Integrative  
 152 multi-omics approach through **e** a machine learning consensus analysis to identify early predictive  
 153 CPPs and CQAs putative candidates for both total live CD4<sup>+</sup> and CD8<sup>+</sup> T<sub>N</sub>+T<sub>CM</sub> cells.

154

155

## 156 II. Optimization of T<sub>N</sub>+T<sub>CM</sub> cells as a function of process parameters

157 Using symbolic regression (DataModeler software from Evolved Analytics LLC), we examined  
 158 the interactive effects of the DMS parameters on yield to simultaneously predict and optimize both  
 159 CD4<sup>+</sup> and CD8<sup>+</sup> T<sub>N</sub>+T<sub>CM</sub>. A model ensemble predicted 4.2 x 10<sup>6</sup> CD4<sup>+</sup> T<sub>N</sub>+T<sub>CM</sub> cells at an



160 optimum setting of 30 U/ $\mu$ L IL2, 2500 carriers/ $\mu$ L, and 100% functionalized mAbs  
161 (Supp.Fig.S1,S3,S4). This result was consistent with the observed maximum value of  $4.0 \times 10^6$ ,  
162 highlighting that CD4<sup>+</sup> T<sub>N</sub>+T<sub>CM</sub> yield was maximized at high levels of DMS parameters (Fig.1b).  
163 In contrast, the predicted optimum yield for CD8<sup>+</sup> T<sub>N</sub>+T<sub>CM</sub> was  $1.9 \times 10^7$  cells at a setting of 30  
164 U/ $\mu$ L IL2, 600 carriers/ $\mu$ L, and 100% functionalized mAbs (Supp.Fig.S2,S3,S4). Although this  
165 combination was not experimentally tested, the closest measured record (30 U/ $\mu$ L IL2, 500  
166 carriers/ $\mu$ L, 100% functionalized mAbs) achieved the predicted maximum yield. Hence, the CD8<sup>+</sup>  
167 T<sub>N</sub>+T<sub>CM</sub> yield was maximized at high IL2 concentration and functionalized mAbs percentage but  
168 low DMS concentration.

169 The DOE analysis highlighted the potential for further optimization of total live CD4<sup>+</sup> T<sub>N</sub>+T<sub>CM</sub>  
170 cells, as well as the potential to optimize the CD4<sup>+</sup> to CD8<sup>+</sup> T<sub>N</sub>+T<sub>CM</sub> cells ratio, at DMS levels  
171 greater than those originally evaluated (DOE). Therefore, to test and validate, a second adaptive  
172 design of experiment (ADOE) was designed to maximize the total live CD4<sup>+</sup> T<sub>N</sub>+T<sub>CM</sub> cells. We  
173 expanded the parameter range, assessing IL2 concentration >30 U/ $\mu$ L and DMS  
174 concentration >2500 carriers/ $\mu$ L (Fig.1b). CD4<sup>+</sup> T<sub>N</sub>+T<sub>CM</sub> and its ratio to CD8<sup>+</sup> T<sub>N</sub>+T<sub>CM</sub>,  $4.7 \times 10^6$   
175 cell and 0.49 respectively, were maximized when IL2 concentration (40 U/ $\mu$ L) and DMS  
176 concentration (3500 carriers/ $\mu$ L) were maximized (Fig.1b;Supp.Table.S2;Supp.Fig.S1-S11).  
177 Utilizing the ADOE dataset, new response ensembles were generated enabling more robust  
178 prediction over the expanded parameter space ( $\uparrow$ IL2 and  $\uparrow$ DMS concentrations).

179

180 III. Multi-omic integrative analysis for early monitoring of T cell manufacturing

181 Due to the heterogeneity of the multivariate data collected and knowing that no single model  
182 structure is perfect for all applications, we implemented an agnostic modeling approach to better  
183 understand these  $T_N+T_{CM}$  responses. To achieve this, a consensus analysis using seven machine  
184 learning (ML) techniques, Random Forest (RF), Gradient Boosted Machine (GBM), Conditional  
185 Inference Forest (CIF), Least Absolute Shrinkage and Selection Operator (LASSO), Partial Least-  
186 Squares Regression (PLSR), Support Vector Machine (SVM), and DataModeler's Symbolic  
187 Regression (SR), was implemented to molecularly characterize  $T_N+T_{CM}$  cells and to extract  
188 predictive features of quality early on their expansion process (Fig.1d-e).

189 SR models achieved the highest predictive performance ( $R^2>93\%$ ) when using multi-omics  
190 predictors for all endpoint responses (Table.1). SR achieved  $R^2>98\%$  while GBM tree-based  
191 ensembles showed leave-one-out cross-validated  $R^2$  (LOO- $R^2$ )  $>95\%$  for  $CD4^+$  and  $CD4^+/CD8^+$   
192  $T_N+T_{CM}$  responses. Similarly, LASSO, PLSR, and SVM methods showed consistent high LOO-  
193  $R^2$ , 92.9%, 99.7%, and 90.5%, respectively, to predict the  $CD4^+/CD8^+$   $T_N+T_{CM}$ . Yet, about 10%  
194 reduction in LOO- $R^2$ , 72.5%-81.7%, was observed for  $CD4^+$   $T_N+T_{CM}$  with these three methods.  
195 Lastly, SR and PLSR achieved  $R^2>90\%$  while other ML methods exhibited exceedingly variable  
196 LOO- $R^2$  (0.3%,RF-51.5%,LASSO) for  $CD8^+$   $T_N+T_{CM}$  cells.

197 The top-performing technique, SR, showed that the median aggregated predictions for  $CD4^+$  and  
198  $CD8^+$   $T_N+T_{CM}$  cells increases when IL2 concentration, IL15, and IL2R increase while IL17a  
199 decreases in conjunction with other features. These patterns combined with low values of DMS  
200 concentration and GM\_CSF uniquely characterized maximum  $CD8^+$   $T_N+T_{CM}$ . Meanwhile, higher  
201 glycine but lower IL13 in combination with others showed maximum  $CD4^+$   $T_N+T_{CM}$  predictions  
202 (Fig.2).

203

204 **Table 1. LOO-R<sup>2</sup> prediction performance results for all ML models when evaluating process**  
 205 **parameters, and features from cytokine and NMR media analysis at day 6 or day 4.**

| LOO-R <sup>2</sup><br>Response/Predictors | ML         |              |              |              |              |              |              |
|-------------------------------------------|------------|--------------|--------------|--------------|--------------|--------------|--------------|
|                                           | SR         | RF           | GBM          | CIF          | LASSO        | PLSR         | SVM          |
| <b>Ratio.of.CD4.to.CD8.TN+TCM.Cells</b>   |            |              |              |              |              |              |              |
| PP+N4                                     | <b>99%</b> | 86.8%        | 96.3%        | <b>84.5%</b> | 88.6%        | 92.5%        | 88.5%        |
| PP+N6                                     | <b>99%</b> | 73.6%        | 95.9%        | 70.1%        | 81.0%        | 95.8%        | 79.7%        |
| PP+S6                                     | <b>99%</b> | <b>87.1%</b> | <b>99.9%</b> | 83.4%        | 87.2%        | 97.9%        | 86.8%        |
| PP+S6+N6                                  | <b>99%</b> | 85.5%        | 95.3%        | 83.4%        | <b>92.9%</b> | <b>99.7%</b> | <b>90.5%</b> |
| <b>Total.live.CD4+.TN+TCM.cells</b>       |            |              |              |              |              |              |              |
| PP+N4                                     | 97%        | 67.0%        | 93.6%        | 69.3%        | 34.3%        | 90.1%        | 75.5%        |
| PP+N6                                     | 96%        | 45.9%        | 92.6%        | 51.2%        | 42.8%        | <b>92.1%</b> | <b>79.4%</b> |
| PP+S6                                     | <b>98%</b> | <b>71.4%</b> | <b>99.9%</b> | <b>75.0%</b> | <b>74.9%</b> | 80.0%        | 75.5%        |
| PP+S6+N6                                  | <b>98%</b> | 68.2%        | 95.6%        | 74.4%        | 72.5%        | 81.7%        | 77.0%        |
| <b>Total.live.CD8+.TN+TCM.cells</b>       |            |              |              |              |              |              |              |
| PP+N4                                     | 93%        | 4.7%         | <b>44.4%</b> | 9.2%         | 1.2%         | 65.1%        | 9.1%         |
| PP+N6                                     | 86%        | 2.0%         | 29.9%        | <b>15.8%</b> | 28.5%        | 63.3%        | 30.6%        |
| PP+S6                                     | <b>93%</b> | <b>7.8%</b>  | 28.0%        | 15.1%        | <b>76.2%</b> | <b>98.4%</b> | <b>49.8%</b> |
| PP+S6+N6                                  | <b>93%</b> | 0.3%         | 32.7%        | 9.8%         | 51.5%        | 96.4%        | 37.8%        |

206 ML models prediction performance is measured as the leave-one-out cross-validated R<sup>2</sup> (LOO-R<sup>2</sup>)  
 207 while SR prediction performance is measured as R<sup>2</sup> of the ensemble prediction where the ensemble  
 208 is composed of diverse models with complexity constrained. Predictors evaluated: (PP) Process  
 209 parameters, (N) NMR, (S) Cytokines measured at day 4 or 6. **max R<sup>2</sup> within each ML method**  
 210 **are shown in bold.**

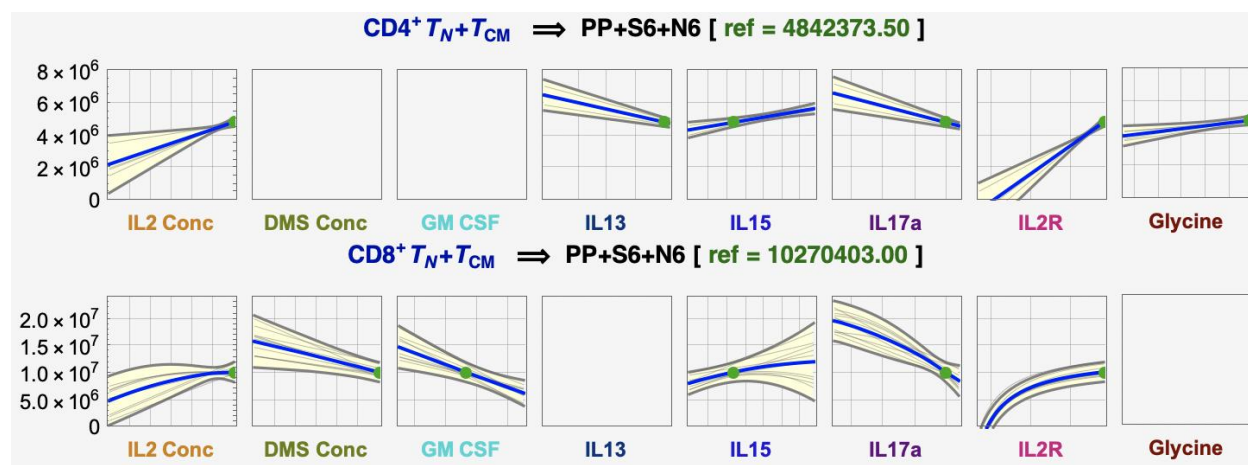

211  
212 **Fig.2. Multi-omics culturing media prediction profiles at day 6 from DataModeler.** Prediction  
213 model profiles from day 6 culturing media monitoring where total live  $CD4^+ T_N+T_{CM}$  is  
214 maximized.

215  
216 Selecting CPPs and CQAs candidates consistently for T cell memory is desired. Here,  $TNF\alpha$  was  
217 found in consensus across all seven ML methods for predicting  $CD4^+/CD8^+ T_N+T_{CM}$  when  
218 considering features with the highest importance scores across models (Fig.3a;Methods). Other  
219 features, IL2R, IL4, IL17a, and DMS concentration, were commonly selected in  $\geq 5$  ML methods  
220 (Fig.3a,c). Moreover, IL13 and IL15 were found predictive in combination with these using SR  
221 (Supp.Table.S4).

222 This integrative analysis of cytokine and NMR media analysis monitored at early stages of the T  
223 cell process provided highly predictive feature combinations of end-product quality. However,  
224 when translating a real-time monitoring strategy to a large-scale manufacturing process, measuring  
225 both cytokine and NMR features from media can be difficult and expensive. To be cost-efficient  
226 and translatable, we demonstrated that either cytokine profiles or NMR media analysis alone is  
227 sufficient to find predictive features without compromising prediction performance.

228

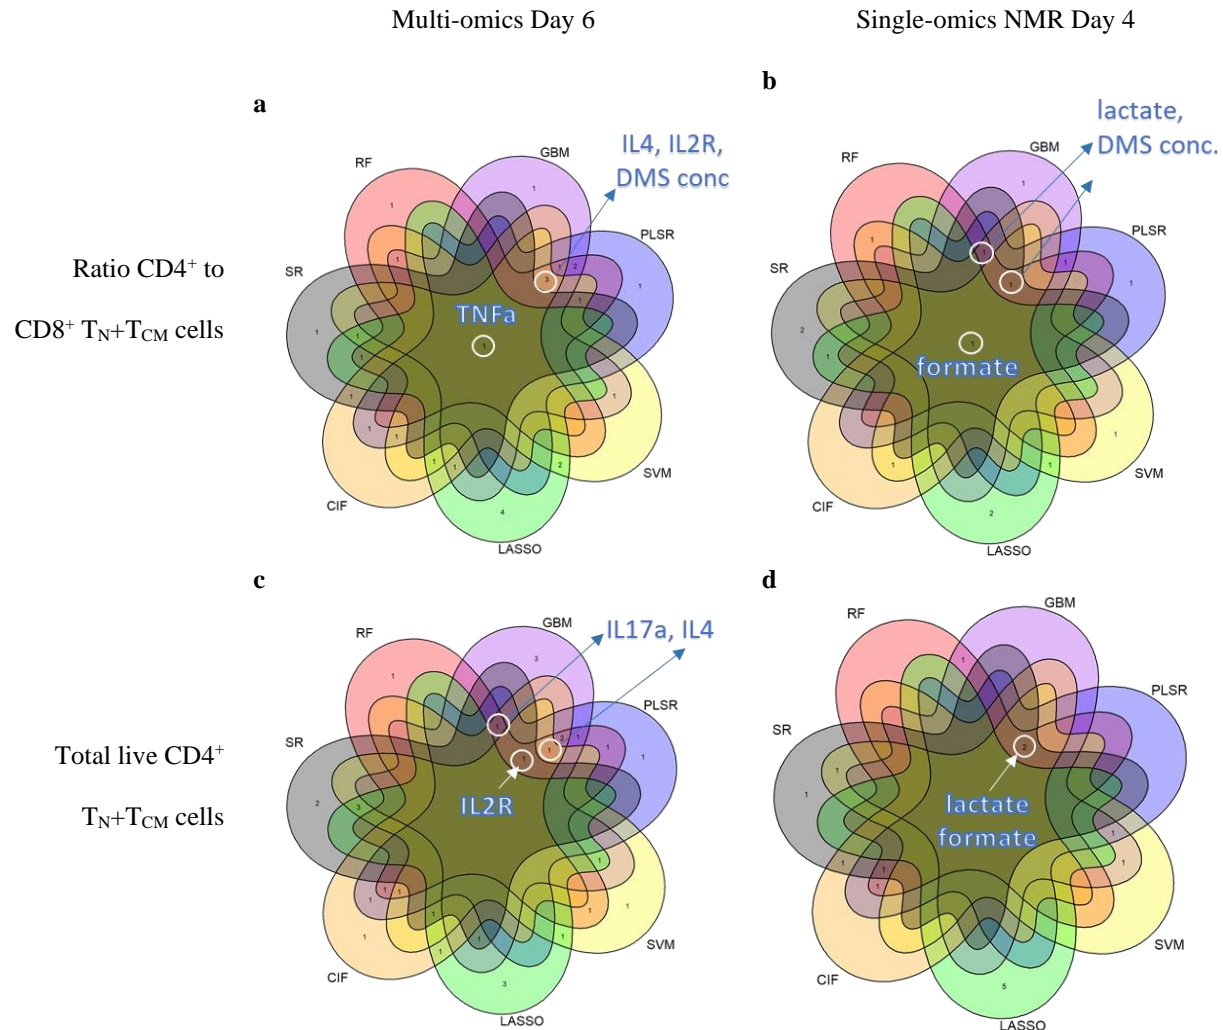

229

230 **Fig.3. ML model consensus of highly predictive for early monitoring of T cell manufacturing.**

231 ML models consensus for **a-b** ratio CD4<sup>+</sup> to CD8<sup>+</sup> T<sub>N</sub>+T<sub>CM</sub> cells, and **c-d** total live CD4<sup>+</sup> T<sub>N</sub>+T<sub>CM</sub>

232 cells for both multi-omics modeling at day 6 and single-omics with NMR at day 4, respectively.

233 Feature names are shown for consensus with 5 or more ML models at the highest-ranking standing

234 (see Methods).

235

236

237 IV. Cytokine media profiles for early prediction

238 ML models using solely media cytokine profiles at day 6 reached similar or higher  $R^2$  than those  
239 of the multi-omics models ( $CD4^+ T_N+T_{CM}$ : 71.4%-99.9%;  $CD4^+/CD8^+$ : 83.4%-99.7%). However,  
240  $CD8^+ T_N+T_{CM}$  still had variable LOO- $R^2$ , 7.8%-93%. Overall, higher cytokine media profiles  
241 showed higher  $CD4^+ T_N+T_{CM}$  and consequently its ratio with  $CD8^+$  (Fig.4a). This behavior was  
242 evident, even beyond day 6, for  $TNF\alpha$ , IL2R, IL17a, and IL4 which were frequently selected as  
243 predictive features across models (Fig.4b-c;Supp.Fig.S20). A more complex behavior was  
244 detected for  $CD8^+ T_N+T_{CM}$  which cannot be explained by cytokine secretion alone (Fig.4d).

245

246 V. NMR media analysis for early prediction

247 Models using only NMR media intensities on day 6 revealed an  $R^2$  decrease of 8.8% and 11.1%,  
248 on average, compared with the multi-omics and cytokine models, respectively. Yet, SR, GBM,  
249 and PLSR reached high LOO- $R^2$  (92.1%-99%), specifically for  $CD4^+/CD8^+$  and  $CD4^+ T_N+T_{CM}$ .  
250 Although good prediction was achieved with NMR media analysis on day 6, we obtain slightly  
251 better predictions with NMR media analysis on day 4 (Table.1). From these models, formate,  
252 lactate, DMS concentration were highly ranked to predict both, ratio  $CD4^+/CD8^+$  and  $CD4^+$   
253  $T_N+T_{CM}$  (Fig.3b,d;Supp.Fig.19d). Some variable combinations also contained histidine, ethanol,  
254 dimethylamine, branch chain amino acids (BCAAs), glucose, and glutamine (Supp.Table.S3).  
255 Lower intensity values for BCAAs, dimethylamine, glucose, and glutamine displayed higher  $CD4^+$   
256  $T_N+T_{CM}$  cells across the different media monitoring times (Supp.Fig.S25). Inversely, higher  
257 intensities of formate and lactate showed higher  $CD4^+ T_N+T_{CM}$  and its ratio with  $CD8^+$  consistently  
258 across time (Fig.5a,b).

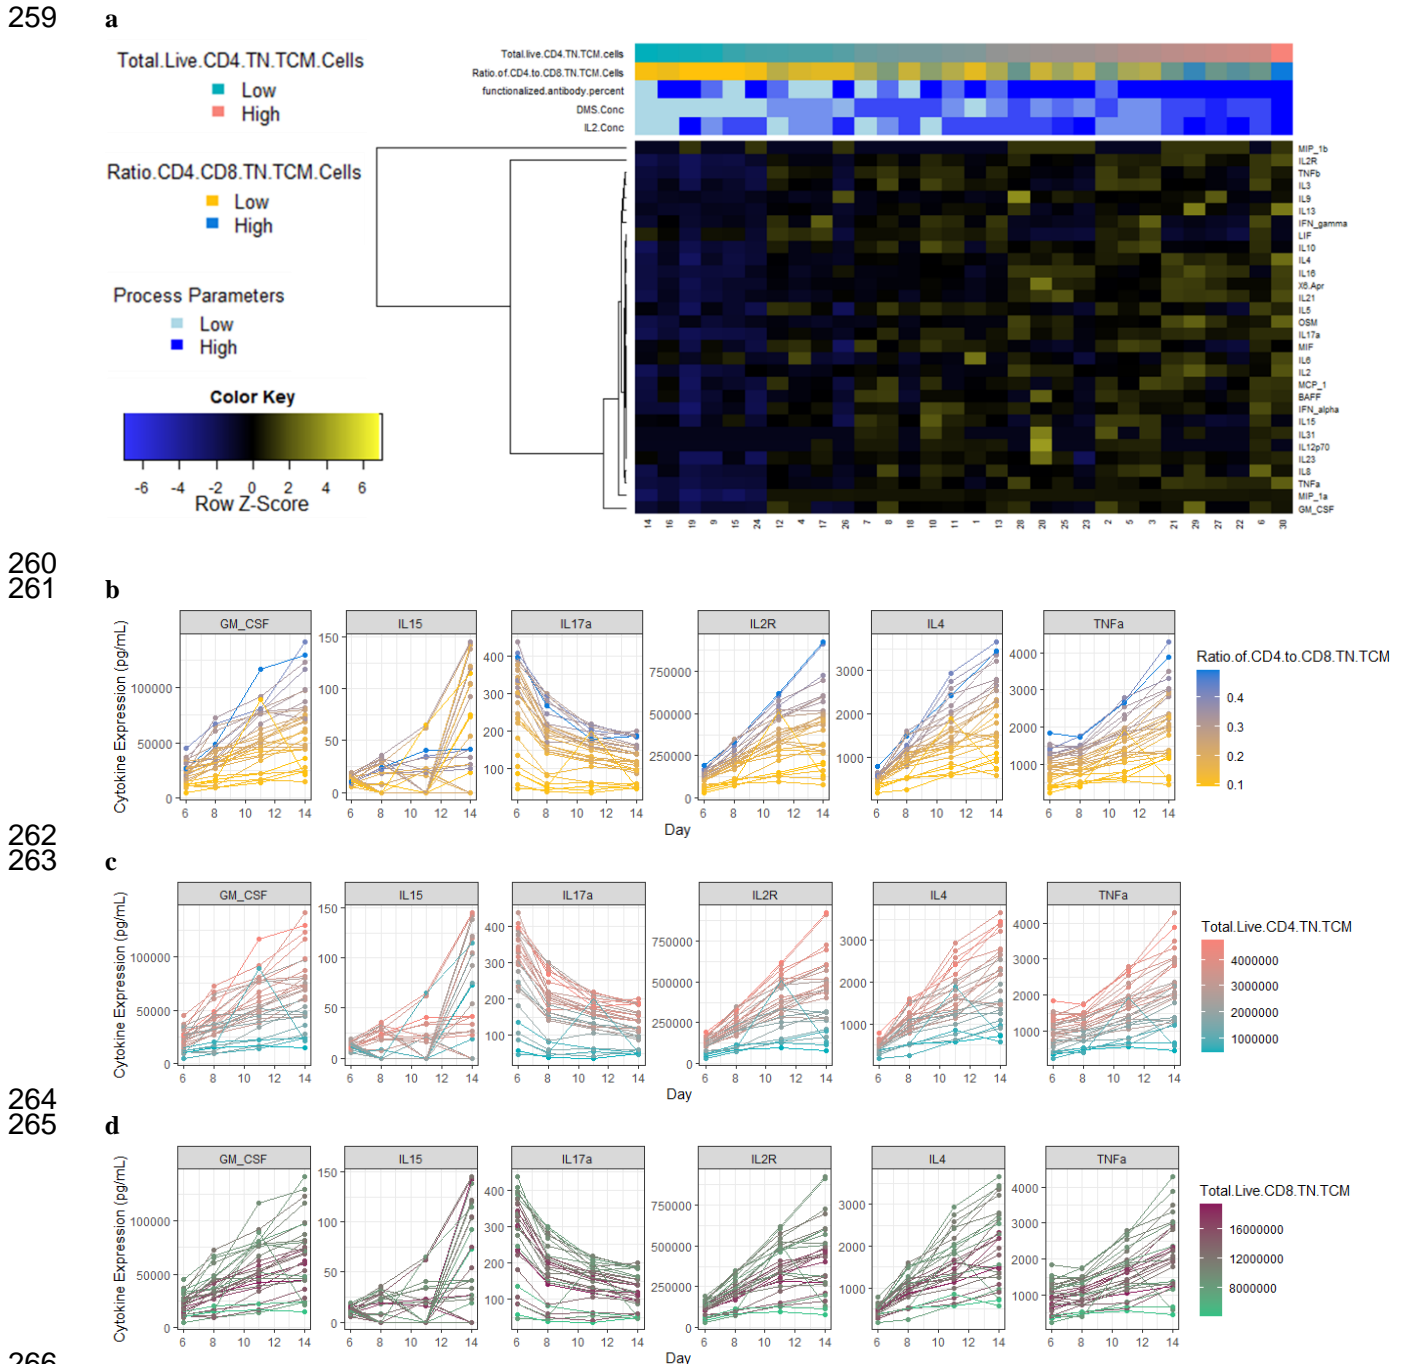

**Fig.4. General characteristics of cytokine media profiles.** **a** Heatmap for cytokine profiles from media samples on day 6. Expression in picograms/milliliter across time points for relevant cytokine features for **b** ratio CD4<sup>+</sup> to CD8<sup>+</sup> T<sub>N</sub>+T<sub>CM</sub> cells, **c** total live CD4<sup>+</sup> T<sub>N</sub>+T<sub>CM</sub> cells, and **d** total live CD8<sup>+</sup> T<sub>N</sub>+T<sub>CM</sub> cells.

272

273

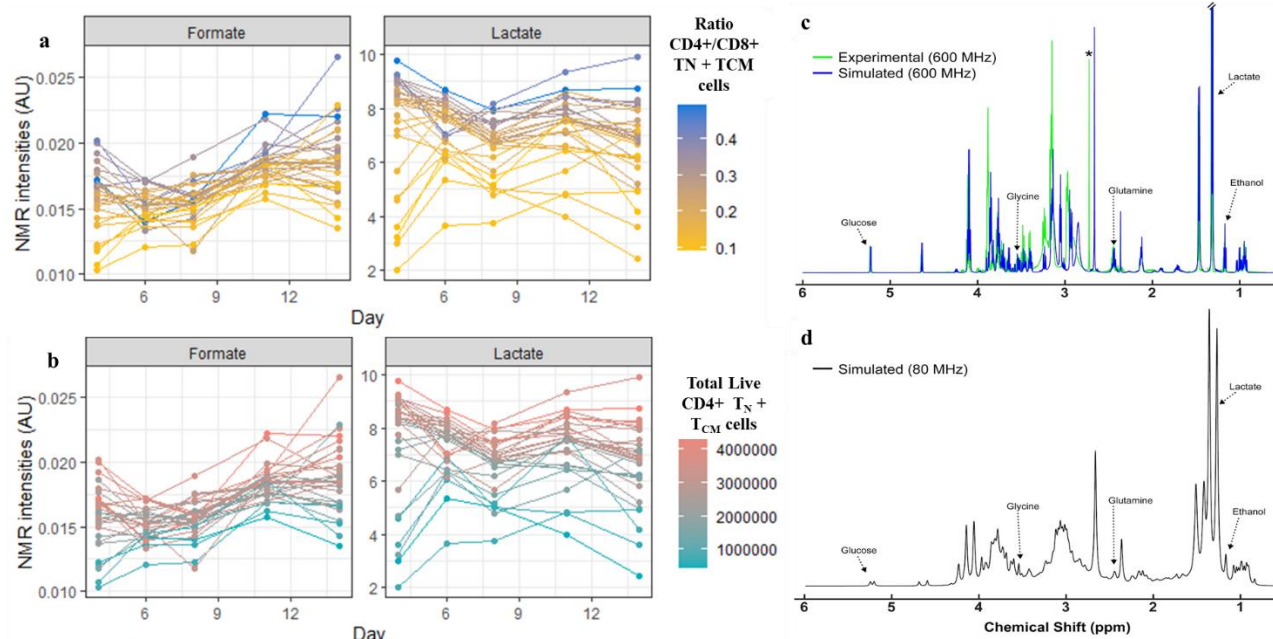

274

275 **Fig.5. Top-performing features NMR media analysis.** NMR intensities in arbitrary units (AU)

276 across time points for **a** Ratio CD4<sup>+</sup>/CD8<sup>+</sup> T<sub>N</sub>+T<sub>CM</sub> cells, and **b** total live CD4<sup>+</sup> T<sub>N</sub>+T<sub>CM</sub> cells. **c**

277 Simulation of <sup>1</sup>H NMR spectrum shows the potential to detect multiple predictive features at lower

278 magnetic fields. Overlay of a pooled experimental spectrum of T-cell culture medium (green) and

279 GISSMO<sup>27,28</sup> simulated spectrum (blue), composed of 19 compounds that reasonably approximate

280 the experimental spectrum acquired at 600 MHz. \*indicates an unknown feature of high intensity

281 that was simulated with 2,3-dimethylamine (blue feature to right). Annotated features in the

282 spectrum correspond to those identified as being highly predictive of output responses across

283 computational methods. **d** GISSMO<sup>27,28</sup> simulated spectrum at 80 MHz, corresponding to a field

284 strength of commercially available benchtop NMR systems.

285

286



## 287 **Discussion**

### 288 I. Optimization of process parameters

289 CPPs modeling and understanding are critical to new product development and in cell therapy  
290 development, it can have life-saving implications. The challenges for effective modeling grow  
291 with the increasing complexity of processes due to high dimensionality, and the potential for  
292 process interactions and nonlinear relationships. Another critical challenge is the limited amount  
293 of available data, mostly small DOE datasets. SR has the necessary capabilities to resolve the  
294 issues of process effects modeling and has been applied across multiple industries<sup>12</sup>. SR discovers  
295 mathematical expressions that fit a given sample and differs from conventional regression  
296 techniques in that a model structure is not defined *a priori*<sup>13</sup>. Hence, a key advantage of this  
297 methodology is that transparent, human-interpretable models can be generated from small and  
298 large datasets with no prior assumptions<sup>14,15</sup>.

299 Since the model search process lets the data determine the model, diverse and competitive (e.g.,  
300 accuracy, complexity) model structures are typically discovered. An ensemble of diverse models  
301 can be formed where its constituent models will tend to agree when constrained by observed data  
302 yet diverge in new regions. Collecting data in these regions helps to ensure that the target system  
303 is accurately modeled, and its optimum is accurately located<sup>14,15</sup>. Exploiting these features allows  
304 adaptive data collection and interactive modeling. Consequently, this adaptive-DOE approach is  
305 useful in a variety of scenarios, including maximizing model validity for model-based decision  
306 making, optimizing processing parameters to maximize target yields, and developing emulators  
307 for online optimization and human understanding<sup>14,15</sup>.

308

### 309 II. Early predictive features

310 An in-depth characterization of potential DMS-based T-cell CQAs includes a list of cytokine and  
311 NMR features from media samples that are crucial in many aspects of T cell fate decisions and  
312 effector functions of immune cells. Cytokine features were observed to slightly improve prediction  
313 and dominated the ranking of important features and variable combinations when modeling  
314 together with NMR media analysis and process parameters (Fig.3b,d).

315 Predictive cytokine features such as  $\text{TNF}\alpha$ , IL2R, IL4, IL17a, IL13, and IL15 were biologically  
316 assessed in terms of their known functions and activities associated with T cells. T helper cells  
317 secrete more cytokines than T cytotoxic cells, as per their main functions, and activated T cells  
318 secrete more cytokines than resting T cells. It is possible that some cytokines simply reflect the  
319  $\text{CD4}^+/\text{CD8}^+$  ratio and the activation degree by proxy proliferation. However, the exact ratio of  
320 expected cytokine abundance is less clear and depends on the subtypes present, and thus  
321 examination of each relevant cytokine is needed.

322 IL2R is secreted by activated T cells and binds to IL2, acting as a sink to dampen its effect on T  
323 cells<sup>16</sup>. Since IL2R was much greater than IL2 in solution, this might reduce the overall effect of  
324 IL2, which could be further investigated by blocking IL2R with an antibody. In T cells, TNF can  
325 increase IL2R, proliferation, and cytokine production<sup>18</sup>. It may also induce apoptosis depending  
326 on concentration and alter the  $\text{CD4}^+$  to  $\text{CD8}^+$  ratio<sup>17</sup>. Given that TNF has both a soluble and  
327 membrane-bound form, this may either increase or decrease  $\text{CD4}^+$  ratio and/or memory T cells  
328 depending on the ratio of the membrane to soluble TNF<sup>18</sup>. Since only soluble TNF was measured,  
329 membrane TNF is needed to understand its impact on both  $\text{CD4}^+$  ratio and memory T cells.  
330 Furthermore, IL13 is known to be critical for Th2 response and therefore could be secreted if there  
331 are significant Th2 T cells already present in the starting population<sup>19</sup>. This cytokine has limited  
332 signaling in T cells and is thought to be more of an effector than a differentiation cytokine<sup>20</sup>. It

333 might be emerging as relevant due to an initially large number of Th2 cells or because Th2 cells  
334 were preferentially expanded; indeed, IL4, also found important, is the conical cytokine that  
335 induces Th2 cell differentiation (Fig.3). The role of these cytokines could be investigated by  
336 quantifying the Th1/2/17 subsets both in the starting population and longitudinally. Similar to  
337 IL13, IL17 is an effector cytokine produced by Th17 cells<sup>21</sup> thus may reflect the number of Th17  
338 subset of T cells. GM-CSF has been linked with activated T cells, specifically Th17 cells, but it is  
339 not clear if this cytokine is inducing differential expansion of CD8<sup>+</sup> T cells or if it is simply a  
340 covariate with another cytokine inducing this expansion<sup>22</sup>. Finally, IL15 has been shown to be  
341 essential for memory signaling and effective in skewing CAR-T cells toward the Tscm phenotype  
342 when using membrane-bound IL15Ra and IL15R<sup>23</sup>. Its high predictive behavior goes with its  
343 ability to induce large numbers of memory T cells by functioning in an autocrine/paracrine manner  
344 and could be explored by blocking either the cytokine or its receptor.

345 Moreover, many predictive metabolites found here are consistent with metabolic  
346 activity associated with T cell activation and differentiation, yet it is not clear how the various  
347 combinations of metabolites relate with each other in a heterogeneous cell population. Formate  
348 and lactate were found to be highly predictive and observed to positively correlate with higher  
349 values of total live CD4<sup>+</sup> T<sub>N</sub>+T<sub>CM</sub> cells (Fig.5a-b;Supp.Fig.28-S30,S38). Formate is a byproduct  
350 of the one-carbon cycle implicated in promoting T cell activation<sup>24</sup>. Importantly, this cycle occurs  
351 between the cytosol and mitochondria of cells and formate excreted<sup>25</sup>. Mitochondrial biogenesis  
352 and function are shown necessary for memory cell persistence<sup>26,27</sup>. Therefore, increased formate  
353 in media could be an indicator of one-carbon metabolism and mitochondrial activity in the culture.  
354 In addition to formate, lactate was found as a putative CQA of T<sub>N</sub>+T<sub>CM</sub>. Lactate is the end-product  
355 of aerobic glycolysis, characteristic of highly proliferating cells and activated T cells<sup>28,29</sup>. Glucose

356 import and glycolytic genes are immediately upregulated in response to T cell stimulation, and  
357 thus generation of lactate. At earlier time-points, this abundance suggests a more robust induction  
358 of glycolysis and higher overall T cell proliferation. Interestingly, our models indicate that higher  
359 lactate predicts higher CD4<sup>+</sup>, both in total and in proportion to CD8<sup>+</sup>, seemingly contrary to  
360 previous studies showing that CD8<sup>+</sup> T cells rely more on glycolysis for proliferation following  
361 activation<sup>30</sup>. It may be that glycolytic cells dominate in the culture at the early time points used for  
362 prediction, and higher lactate reflects more cells.

363 Ethanol patterns are difficult to interpret since its production in mammalian cells is still poorly  
364 understood<sup>31</sup>. Fresh media analysis indicates ethanol presence in the media used, possibly utilized  
365 as a carrier solvent for certain formula components. However, this does not explain the high  
366 variability and trend of ethanol abundance across time (Supp.Fig.S25-S27). As a volatile chemical,  
367 variation could be introduced by sample handling throughout the analysis process. Nonetheless, it  
368 is also possible that ethanol excreted into media over time, impacting processes regulating redox  
369 and reactive oxygen species which have previously been shown to be crucial in T cell signaling  
370 and differentiation<sup>32</sup>.

371 Metabolites that consistently decreased over time are consistent with the primary carbon source  
372 (glucose) and essential amino acids (BCAA, histidine) that must be continually consumed by  
373 proliferating cells. Moreover, the inclusion of glutamine in our predictive models also suggests the  
374 importance of other carbon sources for certain T cell subpopulations. Glutamine can be used for  
375 oxidative energy metabolism in T cells without the need for glycolysis<sup>30</sup>. Overall, these results are  
376 consistent with existing literature that show different T cell subtypes require different relative  
377 levels of glycolytic and oxidative energy metabolism to sustain the biosynthetic and signaling  
378 needs of their respective phenotypes<sup>33,34</sup>. It is worth noting that the trends of metabolite abundance

379 here are potentially confounded by the partial replacement of media that occurred periodically  
380 during expansion (Methods), thus likely diluting some metabolic byproducts (i.e. formate, lactate)  
381 and elevating depleted precursors (i.e. glucose, amino acids). More definitive conclusions of  
382 metabolic activity across the expanding cell population can be addressed by a closed system,  
383 ideally with on-line process sensors and controls for formate, lactate, along with ethanol and  
384 glucose.

### 385 III. Monitoring of T-cell manufacturing with benchtop NMR systems

386 We demonstrated the ability to identify predictive markers using high-magnetic field NMR  
387 spectrometers. However, these are expensive, require a significant amount of resources to house  
388 and maintain, and would be the unlikely option for routine monitoring in industrial cell-  
389 manufacturing. Another common method, liquid chromatography (LC) coupled to mass  
390 spectrometry, has the advantage of a relatively smaller footprint and less upfront cost but it has  
391 other drawbacks such as destruction of the sample and difficulty with components in culture media  
392 that damage LC columns without extraction. Nevertheless, methods like continuous closed-loop  
393 sampling are being developed to address this and might be readily available in the future<sup>35</sup>.  
394 Recently, permanent magnet-based NMR spectrometers (benchtop-size) have become available at  
395 a lower cost. Many of these are readily configured for flow-through reaction monitoring, which  
396 can be leveraged in a closed-cell manufacturing process. To explore the feasibility of such system,  
397 we utilized a spectral simulation to evaluate if putative CQAs identified here could theoretically  
398 be observed and quantified at a magnetic field strength of 80 MHz (benchtop systems). First, the  
399 experimental data acquired at 600 MHz was approximated by creating a simulated mixture of  
400 identified metabolites (Fig.5c) and then simulated at 80 MHz (Fig.5d). While the spectral  
401 resolution is significantly reduced compared to a spectrum at high-field, there are still numerous

402 features that can be attributed to unique metabolites, including those identified as highly predictive  
403 (Fig.5c,d). Although this is promising, there will be challenges to acquiring high-quality data in a  
404 closed bioreactor system, i.e. cells/DMS-particles in suspension, media formulation dictated by  
405 spectral complexity/overlap, and accurate quantitation of features with high overlap from other  
406 signals. However, a dedicated benchtop NMR coupled to a bioreactor could provide a simple  
407 system for real-time monitoring of CQAs.

408 Henceforth, this two-phase approach enabled in-depth characterization and identification of  
409 potential CQAs and CPPs for T cells. More sampling is needed to explore aspects like donor-to-  
410 donor variability, when available it can be incorporated into this workflow which will be enriched  
411 due to its data-driven iterative design that fine-tunes model parameters as more data fits back into  
412 it. Providing a powerful framework to optimize a complex experimental space during the cell-  
413 manufacturing process, and to facilitate the identification of CPPs and early predictive CQAs from  
414 multi-omics, that can be used broadly in the cell therapy and regenerative medicine field to  
415 accurately predict end-of-manufacturing quality at early stages.

416

## 417 **Methods**

### 418 I. Overall multi-omics study design and development: More details

419 The first DOE resulted in a randomized 18-run I-optimal custom design where each DMS  
420 parameter was evaluated at three levels: IL2 concentration (10, 20, and 30 U/ $\mu$ L), DMS  
421 concentration (500, 1500, 2500 carrier/ $\mu$ L), and functionalized antibody percent (60%, 80%,  
422 100%). These 18 runs consisted of 14 unique parameter combinations where 4 of them were  
423 replicated twice to assess prediction error. Process parameters for the ADOE were evaluated at  
424 multiple levels: IL2 concentration (30, 35, and 40 U/ $\mu$ L), DMS concentration (500, 1000, 1500,

425 2000, 2500, 3000, 3500 carrier/ $\mu\text{L}$ ), and functionalized antibody percent (100%) as depicted in  
426 Fig.1b. To further optimize the initial region explored (DOE) in terms of total live  $\text{CD4}^+$   $\text{T}_{\text{N}+\text{T}_{\text{CM}}}$   
427 cells, a sequential adaptive design-of-experiment (ADOE) was designed with 10 unique parameter  
428 combinations, two of these replicated twice for a total of 12 additional samples (Fig.1b). The fusion  
429 of cytokine and NMR profiles from media to model these responses included 30 cytokines from a  
430 custom Thermo Fisher ProcartaPlex Luminex kit and 20 NMR features. These 20 spectral features  
431 from NMR media analysis were selected out of approximately 250 peaks through the  
432 implementation of a variance-based feature selection approach and some manual inspection steps.

433

## 434 II. Microcarrier fabrication

435 Degradable microscaffolds were fabricated as previously described<sup>36</sup>. Briefly, gelatin  
436 microcarriers (CuS, GE Healthcare DG-2001-OO) were suspended at 20 mg/mL in 1X phosphate-  
437 buffered saline (PBS). Sulfo-NHS-biotin (SNB) (Thermo Fisher 21217 or Apex Bio A8001) was  
438 dissolved at 10  $\mu\text{M}$  in ultrapure water and 7.5  $\mu\text{L}$  SNB/mL PBS was added to carrier suspension  
439 and allowed to react for 60 min. After washing the carriers three times in PBS, 40  $\mu\text{g}/\text{mL}$   
440 streptavidin (Jackson ImmunoResearch 016-000-114) was added and allowed to react for 60 min.  
441 Biotinylated mAbs against human CD3 and CD28 were combined in a 1:1 mass ratio and added  
442 to the carriers at 2  $\mu\text{g}$  mAbs/mg carriers. To vary the surface concentration of the antibodies, the  
443 anti-CD3/anti-CD28 mAb mixture was further combined with a biotinylated isotype control to  
444 reduce the overall fraction of targeted mAbs. mAbs were allowed to bind to the carriers for 60  
445 min. All mAbs were low endotoxin azide-free (Biolegend custom, LEAF specification). Fully  
446 functionalized DMSs were washed in sterile PBS and washed once again in the cell culture media

447 to be used for the T cell expansion. The surface concentration of the antibodies was quantified as  
448 previously described using a bicinchoninic acid assay (BCA) kit (Thermo Fisher 23227)<sup>36</sup>.

449

### 450 III. T cell culture (including sample collection)

451 Cryopreserved primary human T cells were obtained as sorted CD3 subpopulations (Astarte  
452 Biotech). T cells were activated by adding DMSs (amount specified by the DOE) at day 0 of culture  
453 immediately after thaw. DMSs were not added or removed during the culture and had antibodies  
454 that were conjugated in proportions specified by the DOE. Initial cell density was  $2.0 \times 10^6$  cells/mL  
455 in a 96 well plate with 300  $\mu$ L volume. Media was serum-free TexMACS (Miltenyi Biotech 170-  
456 076-307) supplemented with recombinant human IL2 in concentrations specified by the DOE  
457 (Peprotech 200-02). Cell cultures were expanded for 14 days as counted from the time of initial  
458 seeding and activation. Cell counts and viability were assessed using acridine orange/propidium  
459 iodide (AO/PI) and a Countess Automated Cell Counter (Thermo Fisher). Media was added to  
460 cultures every 2 days to 3 days in a 3:1 ratio (new volume: old volume) or based on a 300 mg/dL  
461 glucose threshold. The ADOE was done using the same feeding schedule as the initial DOE to  
462 maintain consistency for validation. Media glucose was measured using a ChemGlass glucometer  
463 to confirm cell growth and activation.

464

### 465 IV. Flow cytometry

466 At the end of culture, at least  $1e5$  T cells from each run were washed with PBS once, resuspended  
467 in PBS, and stained with Zombie UV (Biolegend, 423107) for 30 minutes at room temperature in  
468 the dark at a 1:1000 dilution. Cells were spun and resuspended in FACS buffer (1X PBS, 2%  
469 bovine serum albumin, 5 mM EDTA) and were stained with antibodies according to **Table M1** for



470 60 minutes in the dark at 4C. Cells were then resuspended in fresh FACS buffer, after which they  
471 were run on a BD LSR ortessa. All stained was performed in a 96 well v-bottom plate.

472 **Table M1: Flow cytometry antibodies**

| Antigen | Fluorophore | Vendor    | Cat Number |
|---------|-------------|-----------|------------|
| CD3     | APC-Fire    | Biologend | 34839      |
| CD4     | PerCP-Cy5.5 | BD        | 561438     |
| CCR7    | AF647       | BD        | 561438     |
| CD62L   | PE          | BD        | 341012     |

473

474 V. Cytokine measurements

475 Cytokines were measured using a custom ProcartaPlex Luminex kit (Thermo Fisher). The assay  
476 was performed using media samples taken at various time points throughout the T cell culture  
477 according to the manufacturer's instructions with modifications to half the reagent requirements.  
478 Briefly, an 8 point standard curve was created with all included standards. 25  $\mu$ L magnetic beads  
479 were added to all required wells and washed three times. 25  $\mu$ L of each standard or sample was  
480 added to the wells and the plate was sealed and spun at 850 rpm for 120 minutes followed by three  
481 washes. 12.5  $\mu$ L detection antibody was added followed by sealing the plate and spinning for 60  
482 minutes at 850 rpm and three washes. 25  $\mu$ L streptavidin PE was added followed by the same spin  
483 and wash steps. 120  $\mu$ L of reading buffer was added to the plate, the plate was analyzed on a  
484 BioPlex 200 (BioRad). Any samples that were majority over-range (denoted as "OOR >" in the  
485 output spreadsheet) were deemed too concentrated at run at 1/10th their original concentration to  
486 put them within range. All samples were run without technical replicates.

487 Luminex data was preprocessed using R for inclusion in the analysis pipeline as follows. Any  
488 cytokine level that was over-range ("OOR >" in output) was set to the maximum value of the

489 standard curve for that cytokine. Any value that was under-range (“OOR <” in output spreadsheet)  
490 was set to zero. All values that were extrapolated from the standard curve were left unchanged.

491

## 492 VI. NMR metabolomics

### 493 A. Sample preparation

494 50  $\mu$ L of media was collected from each culture at each time point (before media exchange, if  
495 applicable), flash-frozen in liquid nitrogen, and stored at  $-80^{\circ}\text{C}$ . Samples were shipped to CCRC  
496 on dry ice for NMR analysis. Run order of samples was randomized. Samples were prepared in  
497 two batches for each rack of NMR samples to be run. For each rack, samples were pulled and  
498 sorted on dry ice, then thawed at  $4^{\circ}\text{C}$  for 1 hour. Samples were then centrifuged at  $2,990 \times g$  at  
499  $4^{\circ}\text{C}$  for 20 minutes to pellet any cells or debris that may have been collected with the media. 5  
500  $\mu$ L of 100/3 mM DSS-D6 in deuterium oxide (Cambridge Isotope Laboratories) were added to  
501 1.7 mm NMR tubes (Bruker BioSpin), followed by 45  $\mu$ L of media from each sample that was  
502 added and mixed, for a final volume of 50  $\mu$ L in each tube. Samples were prepared on ice and in  
503 predetermined, randomized order. The remaining volume from each sample in the rack ( $\sim 4 \mu\text{L}$ )  
504 was combined to create an internal pool. This material was used for internal controls within each  
505 rack as well as metabolite annotation.

### 506 B. Data collection

507 NMR spectra were collected on a Bruker Avance III HD spectrometer at 600 MHz using a 5-mm  
508 TXI cryogenic probe and TopSpin software (Bruker BioSpin). One-dimensional spectra were  
509 collected on all samples using the noesypr1d pulse sequence under automation using ICON NMR

510 software. Two-dimensional HSQC and TOCSY spectra were collected on internal pooled control  
511 samples for metabolite annotation.

#### 512 C. Data processing

513 One-dimensional spectra were manually phased and baseline corrected in TopSpin. Two-  
514 dimensional spectra were processed in NMRpipe<sup>37</sup>. One dimensional spectra were referenced,  
515 water/end regions removed, and normalized with the PQN algorithm<sup>38</sup> using an in-house  
516 MATLAB (The MathWorks, Inc.) toolbox  
517 ([https://github.com/artedison/Edison\\_Lab\\_Shared\\_Metabolomics\\_UGA](https://github.com/artedison/Edison_Lab_Shared_Metabolomics_UGA)).

#### 518 D. Feature selection

519 To reduce the total number of spectral features from approximately 250 peaks and enrich for those  
520 that would be most useful for statistical modeling, a variance-based feature selection was  
521 performed within MATLAB. For each digitized point on the spectrum, the variance was  
522 calculated across all experimental samples and plotted. Clearly-resolved features corresponding  
523 to peaks in the variance spectrum were manually binned and integrated to obtain quantitative  
524 feature intensities across all samples (Supp.Fig.S24). In addition to highly variable features,  
525 several other clearly resolved and easily identifiable features were selected (glucose, BCAA  
526 region, etc). Some features were later discovered to belong to the same metabolite but were  
527 included in further analysis.

#### 528 E. Metabolite annotation

529 Two-dimensional spectra collected on pooled samples were uploaded to COLMARm web  
530 server<sup>10</sup>, where HSQC peaks were automatically matched to database peaks. HSQC matches were  
531 manually reviewed with additional 2D and proton spectra to confirm the match. Annotations were

532 assigned a confidence score based upon the levels of spectral data supporting the match as  
533 previously described<sup>11</sup>. Annotated metabolites were matched to previously selected features used  
534 for statistical analysis.

#### 535 F. Low-field spectrum simulation

536 Using the list of annotated metabolites obtained above, an approximation of a representative  
537 experimental spectrum was generated using the GISSMO mixture simulation tool.<sup>39,40</sup> With the  
538 simulated mixture of compounds, generated at 600 MHz to match the experimental data, a new  
539 simulation was generated at 80 MHz to match the field strength of commercially available  
540 benchtop NMR spectrometers. The GISSMO tool allows visualization of signals contributed from  
541 each individual compound as well as the mixture, which allows annotation of features in the  
542 mixture belonging to specific compounds.

#### 543 G. Unknown identification

544 Several low abundance features selected for analysis did not have database matches and were not  
545 annotated. Statistical total correlation spectroscopy<sup>41</sup> suggested that some of these unknown  
546 features belonged to the same molecules (not shown). Additional multidimensional NMR  
547 experiments will be required to determine their identity.

548

### 549 VII. Machine learning techniques & statistical analysis

#### 550 A. Machine learning modeling

551 Seven machine learning (ML) techniques were implemented to predict three responses related to  
552 the memory phenotype of the cultured T cells under different process parameters conditions (i.e.  
553 Total Live CD4<sup>+</sup> T<sub>N</sub> and T<sub>CM</sub>, Total Live CD8<sup>+</sup> T<sub>N</sub>+T<sub>CM</sub>, and Ratio CD4<sup>+</sup>/CD8<sup>+</sup> T<sub>N</sub>+T<sub>CM</sub>). The  
554 ML methods executed were Random Forest (RF), Gradient Boosted Machine (GBM), Conditional

555 Inference Forest (CIF), Least Absolute Shrinkage and Selection Operator (LASSO), Partial Least-  
556 Squares Regression (PLSR), Support Vector Machine (SVM), and DataModeler's Symbolic  
557 Regression (SR). Primarily, SR models were used to optimize process parameter values based on  
558  $T_N+T_{CM}$  phenotype and to extract early predictive variable combinations from the multi-omics  
559 experiments. Furthermore, all regression methods were executed, and the high-performing models  
560 were used to perform a consensus analysis of the important variables to extract potential critical  
561 quality attributes and critical process parameters predictive of T-cell potency, safety, and  
562 consistency at the early stages of the manufacturing process.

563 Symbolic regression (SR) was done using Evolved Analytics' DataModeler software (Evolved  
564 Analytics LLC, Midland, MI). DataModeler utilizes genetic programming to evolve symbolic  
565 regression models (both linear and non-linear) rewarding simplicity and accuracy. Using the  
566 selection criteria of highest accuracy ( $R^2 > 90\%$  or noise-power) and lowest complexity, the top-  
567 performing models were identified. Driving variables, variable combinations, and model  
568 dimensionality tables were generated. The top-performing variable combinations were used to  
569 generate model ensembles. In this analysis, DataModeler's *SymbolicRegression* function was used  
570 to develop explicit algebraic (linear and nonlinear) models. The fittest models were analyzed to  
571 identify the dominant variables using the *VariablePresence* function, the dominant variable  
572 combinations using the *VariableCombinations* function, and the model dimensionality (number of  
573 unique variables) using the *ModelDimensionality* function. *CreateModelEnsemble* was used to  
574 define trustable model ensembles using selected variable combinations and these were summarized  
575 (model expressions, model phenotype, model tree plot, ensemble quality, model quality, variable  
576 presence map, ANOVA tables, model prediction plot, exportable model forms) using the  
577 *ModelSummaryTable* function. Ensemble prediction and residual performance were respectively

578 assessed via the *EnsemblePredictionPlot* and *EnsembleResidualPlot* subroutines. Model maxima  
579 (*ModelMaximum* function) and model minima (*ModelMinimum* function) were calculated and  
580 displayed using the *ResponsePlotExplorer* function. Trade-off performance of multiple responses  
581 was explored using the *MultiTargetResponseExplorer* and *ResponseComparisonExplorer* with  
582 additional insights derived from the *ResponseContourPlotExplorer*. Graphics and tables were  
583 generated by DataModeler. These model ensembles were used to identify predicted response  
584 values, potential optima in the responses, and regions of parameter values where the predictions  
585 diverge the most.

586 Non-parametric tree-based ensembles were done through the *randomForest*, *gbm*, and *cforest*  
587 regression functions in R, for random forest, gradient boosted trees, and conditional inference  
588 forest models, respectively. Both random forest and conditional inference forest construct multiple  
589 decision trees in parallel, by randomly choosing a subset of features at each decision tree split, in  
590 the training stage. Random forest individual decision trees are split using the Gini Index, while  
591 conditional inference forest uses a statistical significance test procedure to select the variables at  
592 each split, reducing correlation bias. In contrast, gradient boosted trees construct regression trees  
593 in series through an iterative procedure that adapts over the training set. This model learns from  
594 the mistakes of previous regression trees in an iterative fashion to correct errors from its precursors'  
595 trees (i.e. minimize mean squared errors). Prediction performance was evaluated using leave-one-  
596 out cross-validation (LOO)- $R^2$  and permutation-based variable importance scores assessing %  
597 increase of mean squared errors (MSE), relative influence based on the increase of prediction error,  
598 coefficient values for RF, GBM, and CID, respectively. Partial least squares regression was  
599 executed using the *pls* function from the *pls* package in R while LASSO regression was performed

600 using the *cv.glmnet* R package, both using leave-one-out cross-validation. Finally, the *kernlab* R  
601 package was used to construct the Support Vector Machine regression models.  
602 Parameter tuning was done for all models in a grid search manner using the *train* function from  
603 the *caret* R package using LOO-R<sup>2</sup> as the optimization criteria. Specifically, the number of features  
604 randomly sampled as candidates at each split (*mtry*) and the number of trees to grow (*ntree*) were  
605 tuned parameters for random forest and conditional inference forest. In particular, minimum sum  
606 of weights in a node to be considered for splitting and the minimum sum of weights in a terminal  
607 node were manually tuned for building the CIF models. Moreover, GBM parameters such as the  
608 number of trees to grow, maximum depth of each tree, learning rate, and the minimal number of  
609 observations at the terminal node, were tuned for optimum LOO-R<sup>2</sup> performance as well. For  
610 PLSR, the optimal number of components to be used in the model was assessed based on the  
611 standard error of the cross-validation residuals using the function *selectNcomp* from the *pls*  
612 package. Moreover, LASSO regression was performed using the *cv.glmnet* package with *alpha* =  
613 1. The best lambda for each response was chosen using the minimum error criteria. Lastly, a fixed  
614 linear kernel (i.e. *svmLinear*) was used to build the SVM regression models evaluating the cost  
615 parameter value with best LOO-R<sup>2</sup>. Prediction performance was measured for all models using the  
616 final model with LOO-R<sup>2</sup> tuned parameters. **Table M2** shows the parameter values evaluated per  
617 model at the final stages of results reporting.

618

619 **Table M2: ML parameter values evaluated**

| ML Model | Tuned Parameter Values                                                                                                                                                                       |
|----------|----------------------------------------------------------------------------------------------------------------------------------------------------------------------------------------------|
| RF       | <code>ntree=c(500,1000,1500,2000,2500)</code><br><code>mtry=all possibilities</code>                                                                                                         |
| GBM      | <code>interaction.depth=c(1:4)</code><br><code>n.trees = (1:20)*10</code><br><code>shrinkage=c(0.1,0.01, 0.02)</code><br><code>n.minobsinnode=c(2:6)</code><br><code>bag.fraction=0.5</code> |

|       |                                                                         |
|-------|-------------------------------------------------------------------------|
| CIF   | mtry=all possibilities<br>ntree*=100<br>minsplit* = 6<br>minbucket* = 3 |
| LASSO | alpha=1<br>lambda=seq(0.001,0.05,by = 0.001)                            |
| PLSR  | ncomp = 1:15                                                            |
| SVM   | svmLinear<br>cost=seq(0.05,2,.05)                                       |
|       | *other values besides the ones shown were optimized manually            |

620

## 621 B. Consensus analysis

622 Consensus analysis of the relevant variables extracted from each machine learning model was done  
623 to identify consistent predictive features of quality at the early stages of manufacturing. First  
624 importance scores for all features were measured across all ML models using *varImp* with *caret* R  
625 package except for scores for SVM which *rminer* R package was used. These importance scores  
626 were percent increase in mean squared error (MSE), relative importance through average increase  
627 in prediction error when a given predictor is permuted, permuted coefficients values, absolute  
628 coefficient values, weighted sum of absolute coefficients values, and relative importance from  
629 sensitivity analysis determined for RF, GBM, CIF, LASSO, PLSR, and SVM, respectively. Using  
630 these scores, key predictive variables were selected if their importance scores were within the 80<sup>th</sup>  
631 percentile ranking for the following ML methods: RF, GBM, CIF, LASSO, PLSR, SVM while for  
632 SR variables present in >30% of the top-performing SR models from DataModeler ( $R^2 \geq 90\%$ ,  
633 Complexity  $\leq 100$ ) were chosen to investigate consensus except for NMR media models at day 4  
634 which considered a combination of the top-performing results of models excluding lactate ppms,  
635 and included those variables which were in > 40% of the best performing models. Only variables  
636 with those high percentile scoring values were evaluated in terms of their logical relation  
637 (intersection across ML models) and depicted using a Venn diagram from the *venn* R package.

638



639 **Data availability**

640 The pre-processed set of the data used in this work is available in Supplementary Methods. All

641 NMR data are available at the Metabolomics Workbench<sup>42</sup> with DOI:

642 <http://dx.doi.org/10.21228/M8F982>.

643 **Code availability**

644 Machine learning implementation codes used in this work are available at GitHub

645 ([https://github.com/wandaliz/CMaT\\_TCell\\_MachineLearning/](https://github.com/wandaliz/CMaT_TCell_MachineLearning/)). DataModeler information can be

646 requested at <http://www.evolved-analytics.com/>.

647

648 **References**

- 649 1. Fesnak, A. D., June, C. H. & Levine, B. L. Engineered T cells: the promise and challenges  
650 of cancer immunotherapy. *Nat. Rev. Cancer* **16**, 566–81 (2016).
- 651 2. Rosenberg, S. A. & Restifo, N. P. Adoptive cell transfer as personalized immunotherapy for  
652 human cancer. *Science* **348**, 62–8 (2015).
- 653 3. Dwarshuis, N. J., Parratt, K., Santiago-Miranda, A. & Roy, K. Cells as advanced  
654 therapeutics: State-of-the-art, challenges, and opportunities in large scale biomanufacturing  
655 of high-quality cells for adoptive immunotherapies. *Adv. Drug Deliv. Rev.* **114**, 222–239  
656 (2017).
- 657 4. Roddie, C., O'Reilly, M., Pinto, J. D. A., Vispute, K. & Lowdell, M. Manufacturing chimeric  
658 antigen receptor T cells: issues and challenges. *Cytotherapy* (2019)  
659 doi:10.1016/j.jcyt.2018.11.009.
- 660 5. Roh, K.-H., Nerem, R. M. & Roy, K. Biomanufacturing of Therapeutic Cells: State of the Art,  
661 Current Challenges, and Future Perspectives. *Annu. Rev. Chem. Biomol. Eng.* **7**, 455–478  
662 (2016).
- 663 6. Carmen, J., Burger, S. R., McCaman, M. & Rowley, J. A. Developing assays to address  
664 identity, potency, purity and safety: cell characterization in cell therapy process  
665 development. *Regen. Med.* **7**, 85–100 (2012).
- 666 7. Simon, C. G., Lin-Gibson, S., Elliott, J. T., Sarkar, S. & Plant, A. L. Strategies for Achieving  
667 Measurement Assurance for Cell Therapy Products. *Stem Cells Transl. Med.* **5**, 705–708  
668 (2016).
- 669 8. Campbell, A. *et al.* Concise Review: Process Development Considerations for Cell Therapy.  
670 *Stem Cells Transl. Med.* **4**, 1155–1163 (2015).
- 671 9. Lipsitz, Y. Y., Timmins, N. E. & Zandstra, P. W. Quality cell therapy manufacturing by  
672 design. *Nat. Biotechnol.* **34**, 393–400 (2016).

- 673 10. Better, M., Chiruvolu, V. & Sabatino, M. Overcoming Challenges for Engineered Autologous  
674 T Cell Therapies. *Cell Gene Ther. Insights* **4**, 173–186.
- 675 11. Tyagarajan, S., Spencer, T. & Smith, J. Optimizing CAR-T Cell Manufacturing Processes  
676 during Pivotal Clinical Trials. *Mol. Ther. - Methods Clin. Dev.* **16**, 136–144 (2020).
- 677 12. Kordon, A. K. & Ching-Tai Lue. Symbolic regression modeling of blown film process effects.  
678 in *Proceedings of the 2004 Congress on Evolutionary Computation (IEEE Cat.*  
679 *No.04TH8753)* vol. 1 561-568 Vol.1 (2004).
- 680 13. Koza, J. R. & Koza, J. R. *Genetic Programming: On the Programming of Computers by*  
681 *Means of Natural Selection.* (MIT Press, 1992).
- 682 14. Kotanchek, M. Adaptive Design-of-Experiments. 15.
- 683 15. Kotanchek, M., Smits, G. & Vladislavleva, E. Exploiting Trustable Models via Pareto GP for  
684 Targeted Data Collection. in *Genetic Programming Theory and Practice VI* 1–18 (Springer  
685 US, 2009). doi:10.1007/978-0-387-87623-8\_10.
- 686 16. Witkowska, A. M. On the Role of sIL-2R Measurements in Rheumatoid Arthritis and  
687 Cancers. *Mediators of Inflammation* vol. 2005 121–130  
688 <https://www.hindawi.com/journals/mi/2005/742316/> (2005).
- 689 17. Vudattu, N. K. *et al.* Reverse signalling of membrane-integrated tumour necrosis factor  
690 differentially regulates alloresponses of CD4+ and CD8+ T cells against human  
691 microvascular endothelial cells. *Immunology* **115**, 536–543 (2005).
- 692 18. Mehta, A. K., Gracias, D. T. & Croft, M. TNF activity and T cells. *Cytokine* **101**, 14–18  
693 (2018).
- 694 19. Wong, F. S. Stimulating IL-13 Receptors on T cells: A New Pathway for Tolerance Induction  
695 in Diabetes?-. *Diabetes* **60**, 1657–1659 (2011).
- 696 20. Junttila, I. S. Tuning the Cytokine Responses: An Update on Interleukin (IL)-4 and IL-13  
697 Receptor Complexes. *Front. Immunol.* **9**, (2018).

- 698 21. Amatya, N., Garg, A. V. & Gaffen, S. L. IL-17 Signaling: The Yin and the Yang. *Trends*  
699 *Immunol.* **38**, 310–322 (2017).
- 700 22. Becher, B., Tugues, S. & Greter, M. GM-CSF: From Growth Factor to Central Mediator of  
701 Tissue Inflammation. *Immunity* **45**, 963–973 (2016).
- 702 23. Hurton, L. V. *et al.* Tethered IL-15 augments antitumor activity and promotes a stem-cell  
703 memory subset in tumor-specific T cells. *Proc. Natl. Acad. Sci. U. S. A.* **113**, E7788–E7797  
704 (2016).
- 705 24. Ron-Harel, N. *et al.* Mitochondrial biogenesis and proteome remodeling promotes one  
706 carbon metabolism for T cell activation. *Cell Metab.* **24**, 104–117 (2016).
- 707 25. Pietzke, M., Meiser, J. & Vazquez, A. Formate metabolism in health and disease. *Mol.*  
708 *Metab.* **33**, 23–37 (2020).
- 709 26. van der Windt, G. J. W. *et al.* Mitochondrial Respiratory Capacity Is A Critical Regulator Of  
710 CD8+ T Cell Memory Development. *Immunity* **36**, 68–78 (2012).
- 711 27. Vardhana, S. A. *et al.* Impaired mitochondrial oxidative phosphorylation limits the self-  
712 renewal of T cells exposed to persistent antigen. *Nat. Immunol.* 1–12 (2020)  
713 doi:10.1038/s41590-020-0725-2.
- 714 28. Lunt, S. Y. & Vander Heiden, M. G. Aerobic Glycolysis: Meeting the Metabolic  
715 Requirements of Cell Proliferation. *Annu. Rev. Cell Dev. Biol.* **27**, 441–464 (2011).
- 716 29. Chang, C.-H. *et al.* Posttranscriptional Control of T Cell Effector Function by Aerobic  
717 Glycolysis. *Cell* **153**, 1239–1251 (2013).
- 718 30. Cao, Y., Rathmell, J. C. & Macintyre, A. N. Metabolic Reprogramming towards Aerobic  
719 Glycolysis Correlates with Greater Proliferative Ability and Resistance to Metabolic Inhibition  
720 in CD8 versus CD4 T Cells. *PLOS ONE* **9**, e104104 (2014).
- 721 31. Antoshechkin, A. G. On intracellular formation of ethanol and its possible role in energy  
722 metabolism. *Alcohol Alcohol. Oxf. Oxf.* **36**, 608 (2001).

- 723 32. Sena, L. A. *et al.* Mitochondria are required for antigen-specific T cell activation through  
724 reactive oxygen species signaling. *Immunity* **38**, 225–236 (2013).
- 725 33. Almeida, L., Lochner, M., Berod, L. & Sparwasser, T. Metabolic pathways in T cell activation  
726 and lineage differentiation. *Semin. Immunol.* **28**, 514–524 (2016).
- 727 34. Wang, R. & Green, D. R. Metabolic checkpoints in activated T cells. *Nat. Immunol.* **13**, 907–  
728 915 (2012).
- 729 35. Chilmonczyk, M. A., Kottke, P. A., Stevens, H. Y., Guldberg, R. E. & Fedorov, A. G.  
730 Dynamic mass spectrometry probe for electrospray ionization mass spectrometry monitoring  
731 of bioreactors for therapeutic cell manufacturing. *Biotechnol. Bioeng.* **116**, 121–131 (2019).
- 732 36. Dwarshuis, N. J., Song, H. W., Patel, A., Kotanchek, T. & Roy, K. *Functionalized*  
733 *microcarriers improve T cell manufacturing by facilitating migratory memory T cell*  
734 *production and increasing CD4/CD8 ratio.* <http://biorxiv.org/lookup/doi/10.1101/646760>  
735 (2019) doi:10.1101/646760.
- 736 37. NMRPipe: A multidimensional spectral processing system based on UNIX pipes |  
737 SpringerLink. <https://link.springer.com/article/10.1007/BF00197809>.
- 738 38. Dieterle, F., Ross, A., Schlotterbeck, G. & Senn, H. Probabilistic quotient normalization as  
739 robust method to account for dilution of complex biological mixtures. Application in 1H NMR  
740 metabonomics. *Anal. Chem.* **78**, 4281–4290 (2006).
- 741 39. Dashti, H. *et al.* Spin System Modeling of Nuclear Magnetic Resonance Spectra for  
742 Applications in Metabolomics and Small Molecule Screening. *Anal. Chem.* **89**, 12201–  
743 12208 (2017).
- 744 40. Dashti, H. *et al.* Applications of Parametrized NMR Spin Systems of Small Molecules. *Anal.*  
745 *Chem.* **90**, 10646–10649 (2018).
- 746 41. Holmes, E., Cloarec, O. & Nicholson, J. K. Probing Latent Biomarker Signatures and in Vivo  
747 Pathway Activity in Experimental Disease States via Statistical Total Correlation

- 748 Spectroscopy (STOCSY) of Biofluids: Application to HgCl<sub>2</sub> Toxicity. *J. Proteome Res.* **5**,  
749 1313–1320 (2006).
- 750 42. Sud, M. *et al.* Metabolomics Workbench: An international repository for metabolomics data  
751 and metadata, metabolite standards, protocols, tutorials and training, and analysis tools.  
752 *Nucleic Acids Res.* **44**, D463–D470 (2016).

753
